# Supplementary figures and images for: A multicentre randomized controlled trial on trans-generational attention deficit/hyperactivity disorder (ADHD) in mothers and children (AIMAC): an exploratory analysis of predictors and moderators of treatment outcome
Source: Atypon-hosted journal article supplement (doi:10.1024/1422-4917/a000602), 2018-08-07

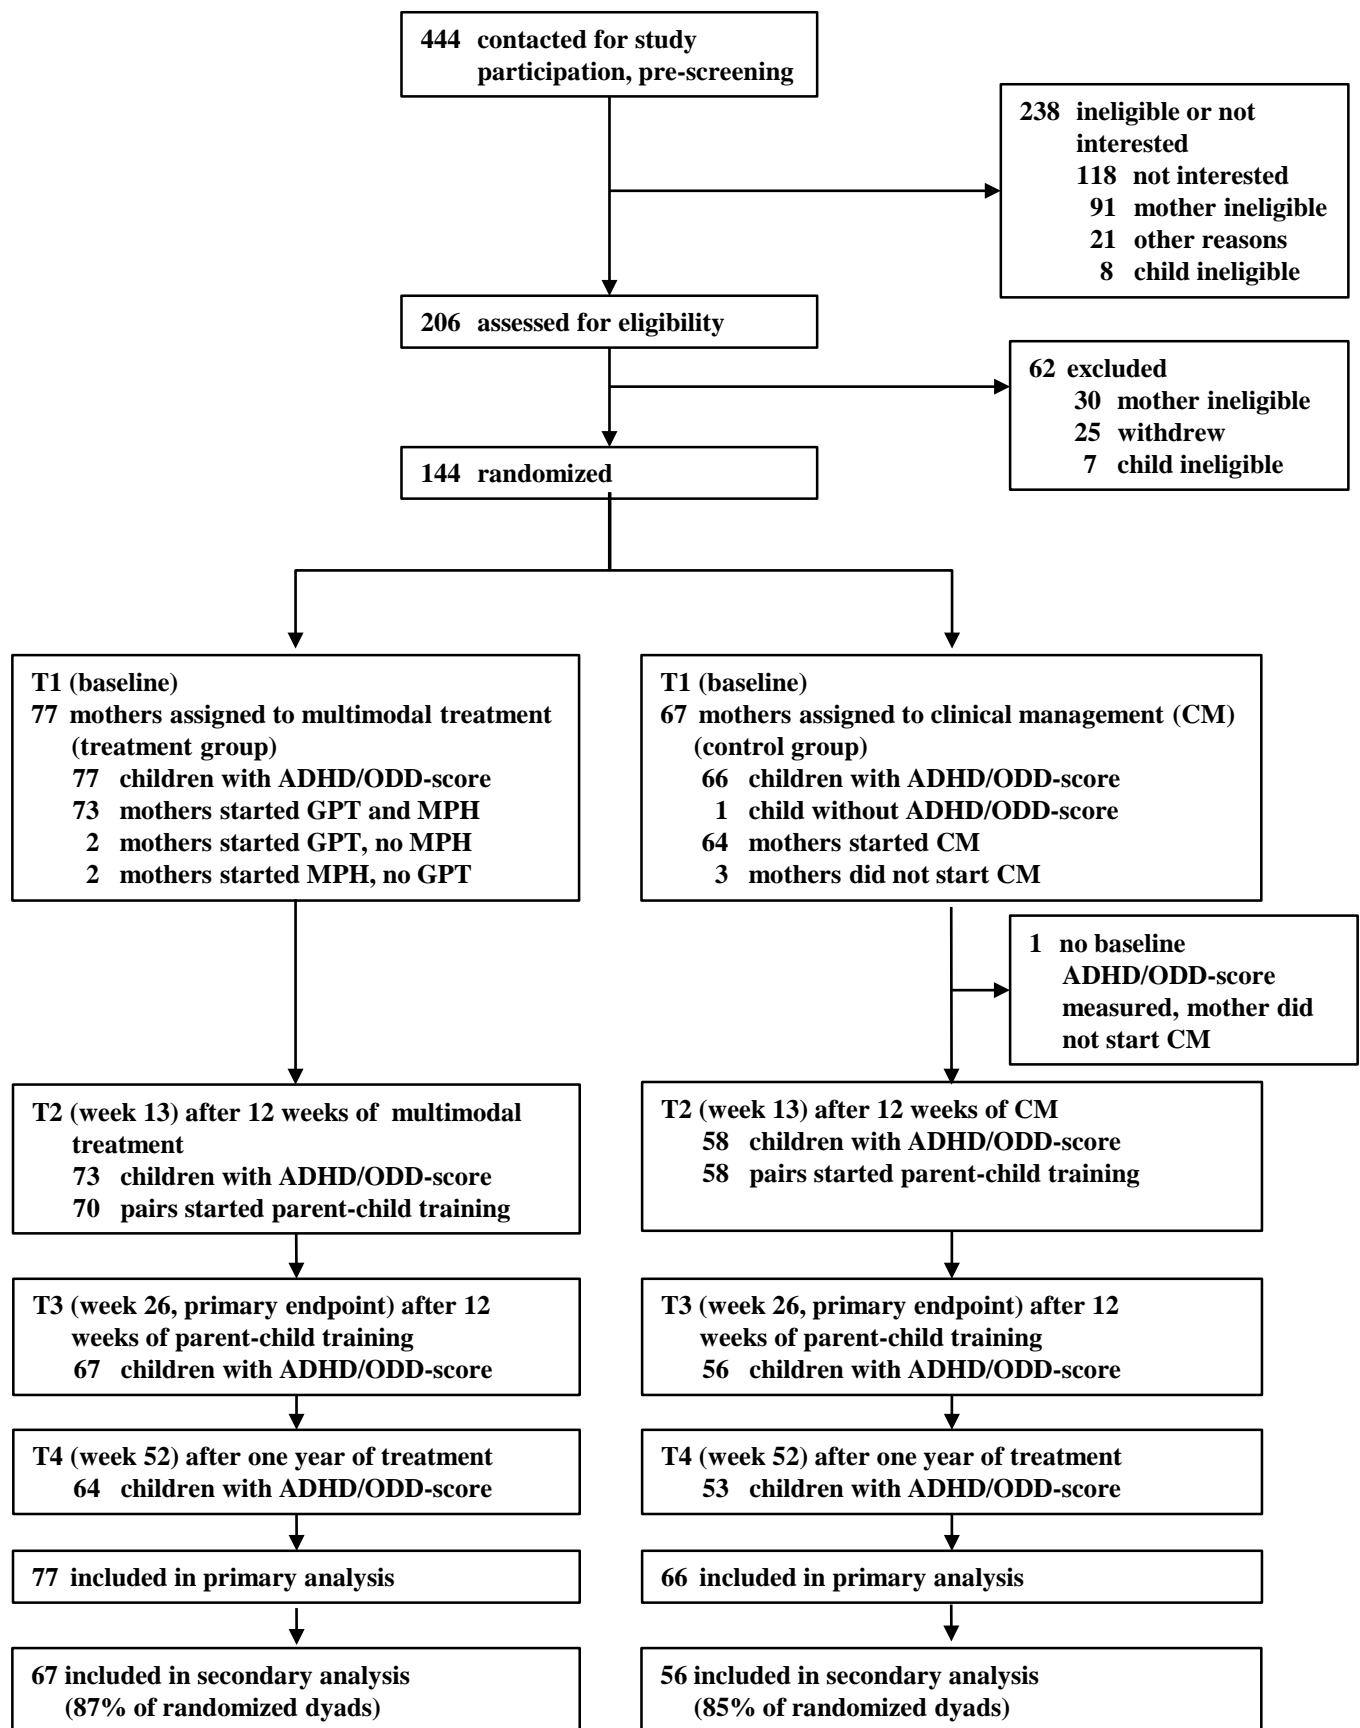

**Figure 1.** Consort diagram of sample flow.

Supplement: 1422-4917_a000602_esm1.pdf [file 1422-4917_a000602_esm1.pdf]
